# Supplementary material
Source: Springer Nature journal article supplement (https://www.springermedizin.de/resource/supplementary/12967_2009_339_MOESM3_ESM.pdf/9576258)

LL-37 (ng/mL)

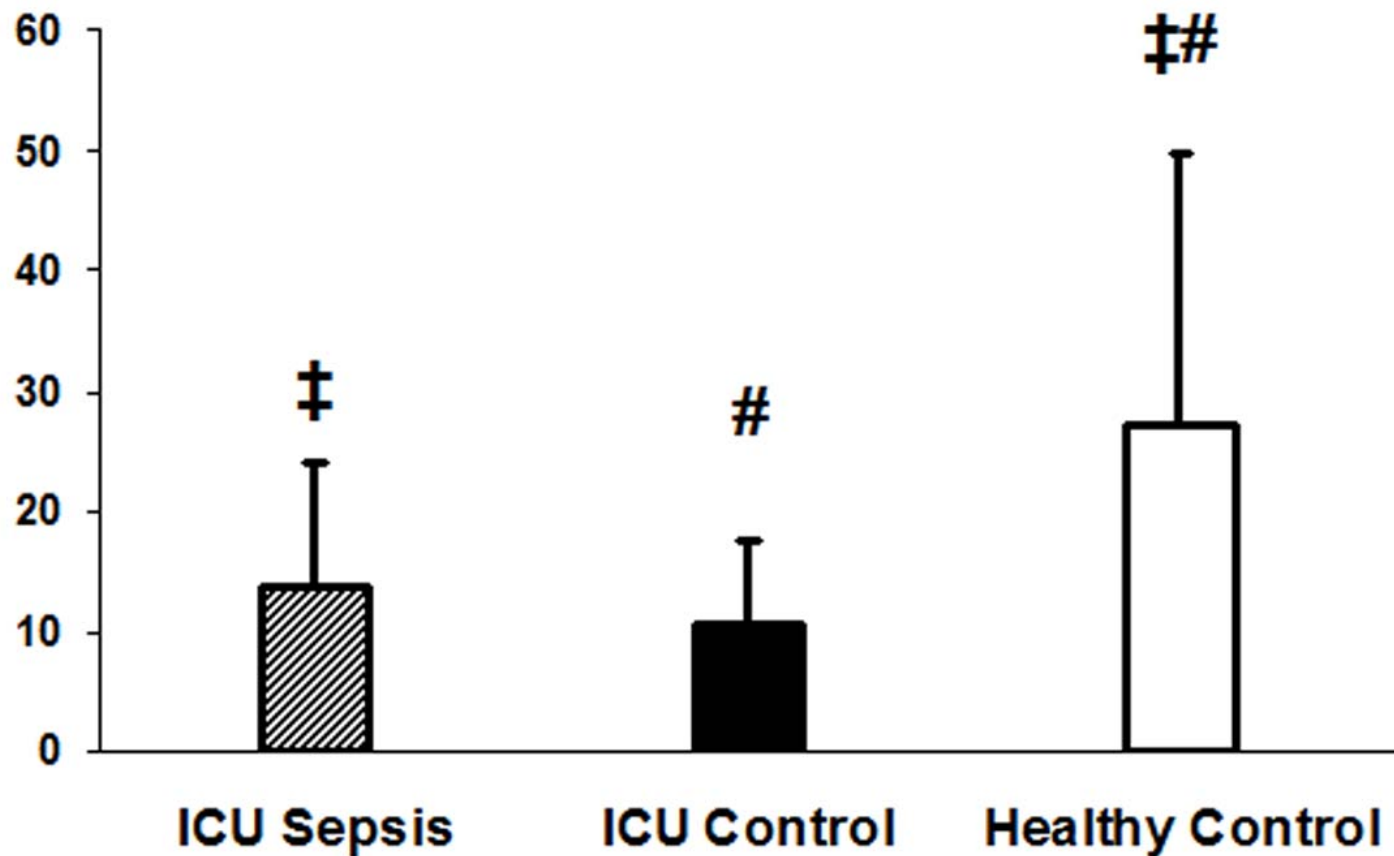

Supplement: MOESM3 [file 9576258]
